# Supplementary material
Source: Springer Nature journal article supplement (https://www.springermedizin.de/resource/supplementary/12889_2010_2190_MOESM1_ESM.pdf/9484908)

### Intervention Group

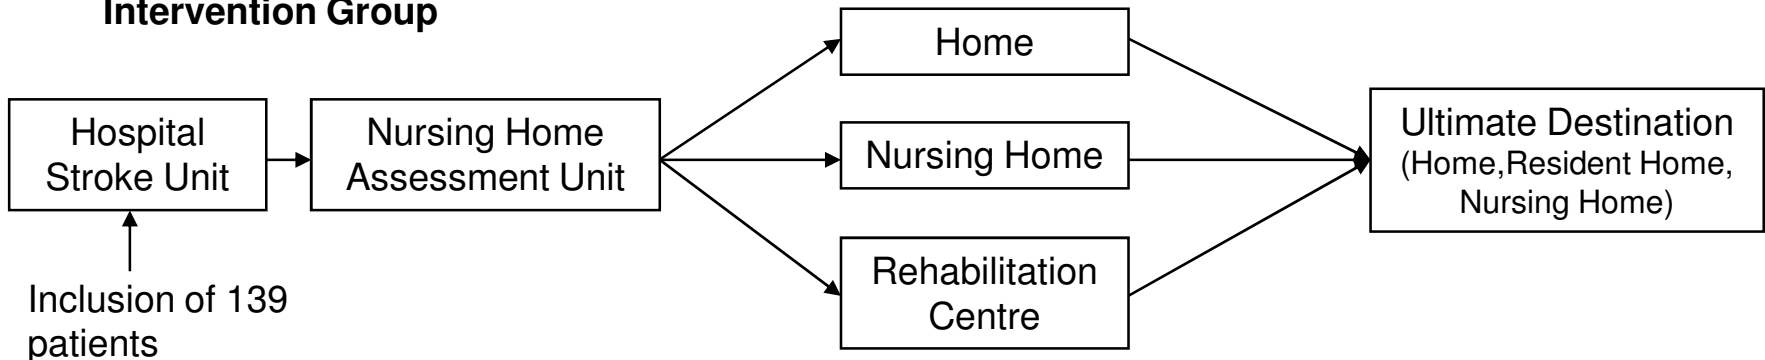

### Usual Care Group

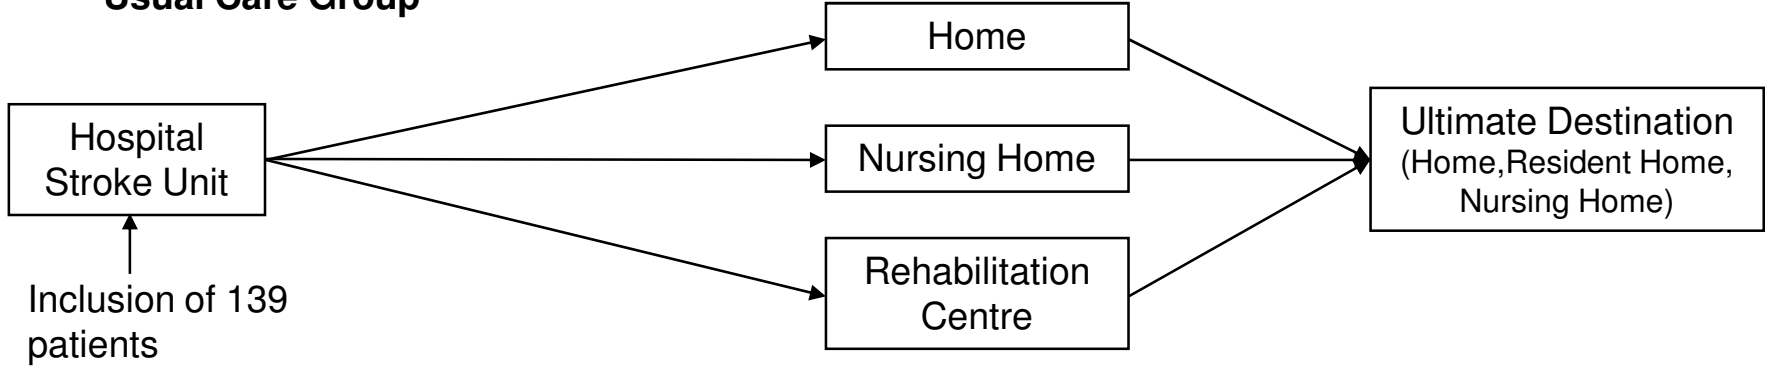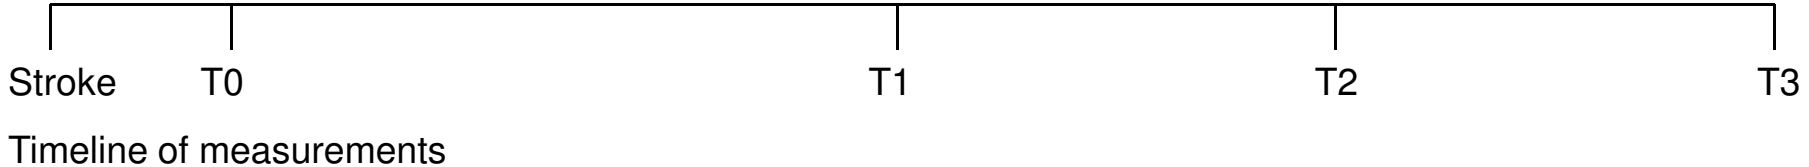

Supplement: MOESM1 [file 9484908]
